# Supplementary material for: Bottom-up synthesis of 2D Co-based metal–organic framework nanosheets by an ammonia-assisted strategy for tuning the crystal morphology
Source: Royal Society of Chemistry journal article supplement (doi:10.1039/c9ce00259f), 2019-01-01
Supplement: c9ce00259f1.pdf [file c9ce00259f1.pdf]

## **Electronic Supplementary Information (ESI)**

# **Bottom-up Synthesis of 2D Co-based Metal-Organic Framework Nanosheets by an Ammonia-assisted Strategy for Tuning the Crystal Morphology**

Pei Nian, Haiou Liu, Xiongfu Zhang\*

*State Key Laboratory of Fine Chemicals, School of Chemical Engineering, Dalian University of Technology, Dalian, 116024, China.*

Corresponding author: [xfzhang@dlut.edu.cn](mailto:xfzhang@dlut.edu.cn) (X. Zhang)

## Supplemental Figures:

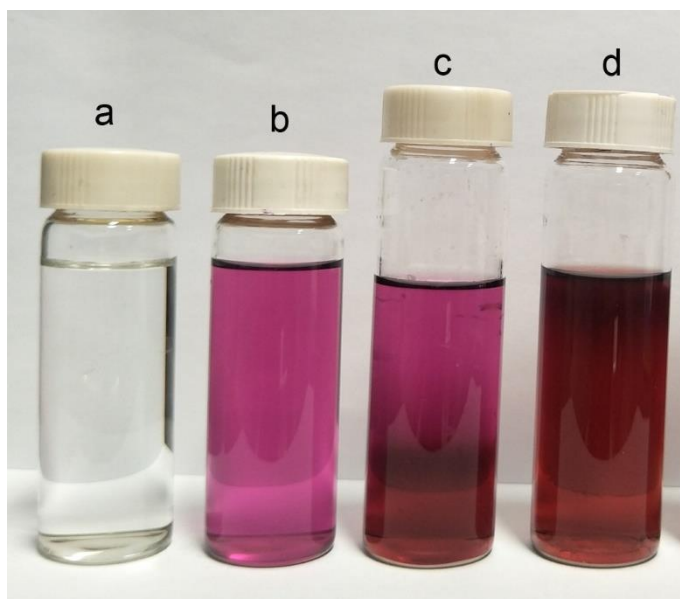

**Figure S1** The digital photographs of precursor solution with different amounts of  $\text{NH}_4\text{OH}$  in the precursor solution: (a) the mixed solution of methanol and toluene; (b) the mixed solution added with  $\text{Co}(\text{Ac})_2 \cdot 4\text{H}_2\text{O}$ ; (c) the mixed solution added with both  $\text{Co}(\text{Ac})_2 \cdot 4\text{H}_2\text{O}$  and  $1\text{mol/L NH}_4\text{OH}$ ; (d) the mixed solution added with both  $\text{Co}(\text{Ac})_2 \cdot 4\text{H}_2\text{O}$  and  $4\text{ mol/L NH}_4\text{OH}$ .

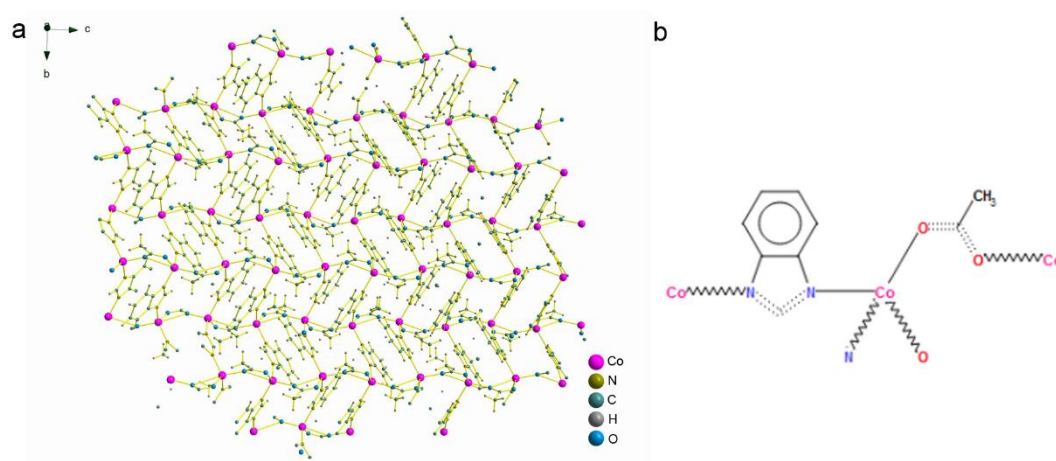

**Figure S2** (a) Packing diagram of  $\text{Co}(\text{bim})(\text{OAc})$  along the  $[100]$  axis highlighting the 2D sheets formed by  $\text{Co}(\text{bim})_{2/2}$  chains and  $\text{Co}(\text{OAc})_{2/2}$  chains connected by  $\text{Co}^{2+}$  tetrahedra; (b) The chemical diagram of  $\text{Co}(\text{bim})(\text{OAc})$ .
